# Supplementary material for: Impact of Direct-Acting Antiviral Therapy on Liver Fibrosis Regression among People with Chronic HCV Infection: Results from a Real-Life Cohort in Patients Who Achieved Sustained Virological Response
Source: MDPI journal article supplement (doi:10.3390/medicina59040814), 2023-04-21
Supplement: s1 [file s1]

**Table S1.** Quantitative description of mean FibroScan® values in men vs. women patients throughout the follow-up period.

| Mean FibroScan® value (kPa) |        |        |
|-----------------------------|--------|--------|
| Measurements                | Men    | Women  |
| 1 <sup>st</sup>             | 13.645 | 12.359 |
| 2 <sup>nd</sup>             | 9.465  | 8.484  |
| 3 <sup>rd</sup>             | 9.124  | 7.667  |
| 4 <sup>th</sup>             | 9.009  | 8.036  |
| 5 <sup>th</sup>             | 8.582  | 7.524  |

**Table S2.** Quantitative description of mean FibroScan® values in patients with high active alcohol use, mild liver steatosis and metabolic syndrome throughout the follow-up period.

| Mean FibroScan® value (kPa) |                         |                      |                    |
|-----------------------------|-------------------------|----------------------|--------------------|
| Measurements                | High active alcohol use | Mild liver steatosis | Metabolic syndrome |
| 1 <sup>st</sup>             | 14.075                  | 14.542               | 17.171             |
| 2 <sup>nd</sup>             | 10.712                  | 10.564               | 12.808             |
| 3 <sup>rd</sup>             | 9.162                   | 9.306                | 10.662             |
| 4 <sup>th</sup>             | 9.546                   | 9.467                | 10.883             |
| 5 <sup>th</sup>             | 8.979                   | 9.067                | 10.429             |

**Table S3.** Quantitative description of mean FibroScan® values in each GT throughout the follow-up period.

| Mean FibroScan® value (kPa) |        |        |        |        |        |
|-----------------------------|--------|--------|--------|--------|--------|
| Measurements                | GT 1A  | GT 1B  | GT 2   | GT 3   | GT 4   |
| 1 <sup>st</sup>             | 14.953 | 12.106 | 14.733 | 13.668 | 11.957 |
| 2 <sup>nd</sup>             | 9.941  | 8.867  | 7.933  | 10.321 | 8.552  |
| 3 <sup>rd</sup>             | 9.141  | 8.026  | 7.8    | 10.068 | 8.243  |
| 4 <sup>th</sup>             | 9.112  | 8.137  | 7.5    | 10.232 | 7.957  |
| 5 <sup>th</sup>             | 8.525  | 7.728  | 7.367  | 9.982  | 7.461  |

**Table S4.** Quantitative description of mean FibroScan® values in each therapeutic regimen throughout the follow-up period.

| Mean FibroScan® value (kPa) |       |         |         |         |         |         |
|-----------------------------|-------|---------|---------|---------|---------|---------|
| Measurements                | NAïVE | PTP IFN | PRP DAA | PRP IFN | NRP DAA | NRP IFN |
| 1 <sup>st</sup>             | 12.82 | 12.338  | 14.509  | 11.336  | 18.733  | 15.583  |
| 2 <sup>nd</sup>             | 8.975 | 9.337   | 12.127  | 7.696   | 15.1    | 10.1    |
| 3 <sup>rd</sup>             | 8.352 | 8.525   | 10.382  | 7.796   | 14.15   | 9.442   |
| 4 <sup>th</sup>             | 8.342 | 8.788   | 11.355  | 7.211   | 13.767  | 9.864   |
| 5 <sup>th</sup>             | 7.952 | 7.987   | 11      | 6.925   | 13.85   | 8.961   |

**Table S5.** Quantitative description of mean FibroScan® values in patients with at least one HCV complication vs. patients without HCV complications throughout the follow-up period (left side). Quantitative description of mean FibroScan® values in patients who died from HCV complications vs. patients who died from other causes throughout the follow-up period (right side).

| Measurements    | Mean FibroScan® value (kPa)   |                      |                              |                         |
|-----------------|-------------------------------|----------------------|------------------------------|-------------------------|
|                 | At least one HCV complication | No HCV complications | Death from HCV complications | Death from other causes |
| 1 <sup>st</sup> | 23.095                        | 11.364               | 24.52                        | 13.333                  |
| 2 <sup>nd</sup> | 15.535                        | 8.094                | 16.3                         | 10.133                  |
| 3 <sup>rd</sup> | 14.312                        | 7.6                  | 14.66                        | 10.278                  |
| 4 <sup>th</sup> | 14.82                         | 7.54                 | 16.34                        | 9.111                   |
| 5 <sup>th</sup> | 13.828                        | 7.191                | 16.52                        | 9.078                   |

**Table S6.** Quantitative description of mean FibroScan® values in each complication throughout the follow-up period.

| Measurements    | Mean FibroScan® value (kPa) |                                   |         |                |                |                |
|-----------------|-----------------------------|-----------------------------------|---------|----------------|----------------|----------------|
|                 | Hepatocellular carcinoma    | Liver transplantation requirement | Ascites | Encephalopathy | Varicose veins | Kidney failure |
| 1 <sup>st</sup> | 27.582                      | 40.333                            | 20.486  | 25.98          | 29.021         | 17.464         |
| 2 <sup>nd</sup> | 19.1                        | 31.417                            | 14.214  | 19.08          | 19.947         | 12.245         |
| 3 <sup>rd</sup> | 17.527                      | 28.983                            | 12.836  | 15.14          | 18.568         | 11.5           |
| 4 <sup>th</sup> | 18.845                      | 30.7                              | 13.95   | 16.6           | 19.026         | 11.364         |
| 5 <sup>th</sup> | 18.6                        | 29.65                             | 13.743  | 15.76          | 17.132         | 10.564         |
